# Supplementary material for: Tracer-based Rapid Anthropogenic Carbon Estimation (TRACE)
Source: Copernicus journal article supplement (doi:10.5194/essd-2024-560), 2024-12-11
Supplement: Supplementary file 1 [file essd-2024-560-supplement.pdf]

# Supplementary Materials for:

## Tracer-based Rapid Anthropogenic Carbon Estimation (TRACE)

Brendan R. Carter<sup>1</sup>, Jörg Schwinger<sup>3</sup>, Rolf Sonnerup<sup>2</sup>, Andrea J. Fassbender<sup>1</sup>, Jonathan D.  
5 Sharp<sup>2,1</sup>, Larissa M. Dias<sup>2,1</sup>

<sup>1</sup>NOAA/OAR Pacific Marine Environmental Laboratory, Seattle, WA, USA

<sup>2</sup>Cooperative Institute for Climate, Ocean, and Ecosystem Studies, University of Washington, Seattle, WA, 98115

<sup>3</sup>Norwegian Research Center, University of Bergen, Nygårdsgaten 112, 5008 Bergen, Norway

### 10 **1 Supplementary Text S1: Example application that would benefit from TRACEv1**

The Empirical Seawater Property Estimation Routines (ESPERs) (Carter et al., 2021a) provide an example of an application that needs computationally efficient and time-varying  $C_{\text{anth}}$  estimates in the absence of transient tracer measurements. A subset of these routines is trained from reference-year-adjusted DIC and produce DIC and pH estimates that account for both the reference year conditions and the  $C_{\text{anth}}$  accumulation since the reference year.

15 The  $C_{\text{anth}}$  estimation strategy currently employed in these routines is both computationally inefficient when returning a small number of values (requiring up to a minute for the first  $C_{\text{anth}}$  estimate) and becomes highly unreliable for generating plausible estimates beyond a narrow date range. The accuracy of the  $C_{\text{anth}}$  adjustments used by ESPER is also unassessed and presumed to be low.

### **2 Supplementary Test S2: Construction of the neural network committees**

20 TRACEv1 relies on five sets of neural networks that are formulated using identical architecture to the ESPER\_NN (Empirical Seawater Property Estimation Routines with Neural Networks) routines of Carter et al. (2021a). Each “neural network” is, more accurately, two committees of four feed-forward neural-networks each with up to two hidden layers, with the following number of neurons per layer: [20 -], [15 5], [10 10], and [5 15]. Neural network training is accomplished with a Levenberg-Marquardt backpropagation (using the train.m MATLAB function) with  
25 default settings: 70% of the data are used for training and 15%, each, used for testing and validation. One committee is used in the Atlantic and the Arctic, with a second committee being used in the rest of the ocean. When transitioning between the two committees in the South Atlantic and near the Bering Strait, a weighted average is taken between the committee results with the transitions in the weights occurring linearly over  $\sim 8^\circ$  of latitude. All neural networks have only a single output. The results from all members of the appropriate committee are  
30 averaged for the final neural network result. All neural networks are trained with the following predictor information: user-provided longitude is converted within the routines to the cosine of the longitude expressed in positive  $^\circ\text{E}$  after subtracting  $20^\circ\text{E}$  (to align the minimum sensitivity with the narrow band of ocean south of Africa) and the sine of the Longitude expressed in positive  $^\circ\text{E}$  minus  $20^\circ\text{E}$  (to align the minimum sensitivity with the

35 transition between the Indian and Pacific Oceans),  $S$  provided as a unitless number, and temperature is expressed in  
°C which is converted by TRACEv1 routines to potential temperature. While  $S$  is predominantly available in global  
measurement repositories as a unitless number, supplying TRACEv1 with the modern convention of absolute  
salinities expressed as parts per thousand of the mass of seawater will not meaningfully change the estimated  $C_{\text{anth}}$ .  
The rationales behind these neural network choices are similar to those given for the nearly-identical choices used  
by Carter et al. (2021) and the related choices used earlier by Bittig et al. (2018) for the CANYON-B routines that  
40 inspired ESPER\_NN.

We note that the neural network for  $\alpha$  is fit to  $\log_{10}|\alpha|$  instead of directly to  $\alpha$  because small errors in small values of  
 $\alpha$  have a comparable impact on the TTD age distribution and  $C_{\text{anth}}$  estimates to larger errors in large values of  $\alpha$ .

### 3 Supplementary Text S3: Performed property estimate errors are likely a small component of $C_{\text{anth}}$ 45 estimate errors

The TRACEv1 uncertainty tolerance for the  $\text{TA}^0$  estimate is large: an error of  $10 \mu\text{mol kg}^{-1}$  in  $\text{TA}^0$  corresponds to  
TRACEv1  $C_{\text{anth}}$  estimate error of only  $\sim 0.4 \mu\text{mol kg}^{-1}$ . Considering that the neural network reconstruction error for  
the  $\text{TA}^0$  gridded training data is modest (bias= $0.0 \mu\text{mol kg}^{-1}$ ,  $\pm 1s = 5 \mu\text{mol kg}^{-1}$ ) compared to the uncertainty in the  
underlying  $\text{TA}^0$  estimates of  $9.4 \mu\text{mol kg}^{-1}$  (Carter et al., 2021b), and the sensitivities and reconstruction errors are  
50 significantly smaller still for  $\text{Si}^0$  and  $\text{P}^0$ , the contributions from performed property estimates to  $C_{\text{anth}}$  uncertainty are  
therefore thought to be small relative to other contributions (as was also found by He et al. (2018)). This  
contribution is also implicitly incorporated into our model-derived uncertainty estimate when we use the neural  
networks trained on the Carter et al. (2021b) performed property estimates—made for the real-world ocean—for  
GOBM model output with unknown and presumably-different performed properties unique to the GOBM  
55 circulation and biogeochemistry. These uncertainties are therefore also implicitly included in the TRACEv1  
uncertainty estimates.

### 4 Supplementary Text S4: Information about code speed optimization

TRACEv1 takes  $\sim 0.06$  seconds per estimate on a personal laptop. Increasing the pH convergence tolerance in the  
CO2SYS calculation speeds the code by reducing the iterations required to converge on a final value while only  
60 changing the TRACEv1  $C_{\text{anth}}$  reconstruction RMSE at the 5<sup>th</sup> significant digit. Recognizing that the carbonate  
chemistry of seawater is non-linear whereas DIC mixes conservatively, earlier versions of the code were designed to  
calculate  $C_{\text{anth}}$  values for each of the atmospheric  $\text{CO}_2$  concentrations specific to each of the many ages that  
comprise a TTD age distribution before combining the distributions into a single fraction-weighted mean  $C_{\text{anth}}$   
estimate. However, this approach generated estimates that were indistinguishable from the values obtained from the  
65 adopted method (within uncertainties) and required invoking the carbonate chemistry solver hundreds of additional  
times per calculation. This significantly slowed the calculation without meaningfully improving fidelity.

## 5 Supplementary Text S5: Model and OCIM information extraction methods

The age ( $A$ ) values are linearly interpolated by latitude, longitude, and depth from the 3-D OCIM grid with nearest neighbor extrapolation using “scatteredInterpolant.m.” For this and subsequent gridded-value interpolations, the values with a  $0^\circ \text{ E} < \text{longitude} < 20^\circ \text{ E}$  are copied to  $360^\circ \text{ E} < \text{longitude} < 380^\circ \text{ E}$  and the values with a  $340^\circ \text{ E} < \text{longitude} < 360^\circ \text{ E}$  are copied to  $-20^\circ \text{ E} < \text{longitude} < 0^\circ \text{ E}$ . In addition, depths are divided by 25 m and latitudes multiplied by 4 such that properties tend to vary more equally for a given change in the various coordinates. These measures are often essential for plausibly interpolating scattered 3-D data, but usually only provide a minor improvement when interpolating readily interpolated gridded values like the OCIM  $A$  estimates and the GOBM output.

In order to subsample the GOBMs in a fashion that is consistent with the available real-world observations, modeled values of annually-averaged simulated CFC-11, CFC-12, and SF<sub>6</sub> concentrations; temperature; salinity; and DIC are linearly interpolated from the 3-dimensional model grid to the sparse locations and times at which all three transient tracer measurements of interest are available in the GLODAPv2.2023 data product. Rather than a 4-dimensional interpolation with time, the GOBM output from each year is used for 3-dimensional interpolations at locations measured in the same year. The GOBM output comes from the NorESM RECCAP2 simulation suite (Müller, 2023). We use output from simulation “A” to estimate simulated measurements. Simulation A aims to represent a variable forcing as represented by atmospheric reanalysis products along with continued  $C_{\text{anth}}$  accumulation in the atmosphere and ocean. Simulated  $C_{\text{anth}}$  is then defined as the difference between this simulation and the “D” simulation that has identical physical forcing but fixed preindustrial atmospheric  $C_{\text{anth}}$  (and therefore no marine  $C_{\text{anth}}$  accumulation). As a final step, the model transient tracer output is converted to partial pressure equivalents using the pCFCfromCFC.m function distributed alongside the TRACEv1 code (though never invoked by it), and simulated concentrations are converted to substance amount contents by dividing by the density of the seawater calculated from the modeled  $S$  and  $T$ . For the reconstruction error analysis, annually-averaged output is extracted from 1980 and 2014 c.e.

## 6 Supplementary Text S6: Model reconstruction estimate of TRACEv1 estimate uncertainty

The  $\alpha$  values fit to the NorESM output can be used directly—without invoking the neural networks used by TRACEv1 to remap  $\alpha$ —to estimate  $C_{\text{anth}}$  at the locations and times where the  $\alpha$  values were fit to simulated transient tracer distributions and the interpolated OCIM age distribution. These reconstructions show strong agreement with NorESM  $C_{\text{anth}}$  distributions, with bias ( $\pm$ root-mean-squared, RMS) errors of  $-1.5 (\pm 4.5) \mu\text{mol kg}^{-1}$  (Table S1). Interestingly, these errors decrease slightly—to  $-1.2 (\pm 4.1) \mu\text{mol kg}^{-1}$ —when the TRACEv1\_Validation neural networks are used to reconstruct the  $\alpha$  values at these same locations. This improvement is likely found because the statistical smoothing across space (along a cruise) and time (between cruises) inherent to the neural network estimates is helpful for the  $C_{\text{anth}}$  reconstruction.

When applying the TRACEv1\_Validation\_NorESM to the full model grid from 1980 and 2014, the errors become  $-0.6 (\pm 4.4) \mu\text{mol kg}^{-1}$ . The overall inventory estimates (given in Table S1) are within 15% of the simulated values,

105 though we caution that this is not a robust result with only 2 realizations from 1 model simulation set. We note that  
the average year of the viable combinations of transient tracer measurements used to fit versions of TRACE (notably  
those that include the recent SF<sub>6</sub> measurements) is 2012.4 c.e., so the smaller average absolute bias in 2014 could  
perhaps be explained by the measurements providing a stronger constraint for the ventilation history in this later  
period. If correct, this would imply that new measurements remain useful for quantifying variability in the true  
110 ventilation history of the ocean interior, and that steady state circulation estimates (and thus projections) can only  
yield so much reconstruction fidelity. An alternative explanation is that the inventory error is relatively consistent  
while the inventory is smaller in the previous period. Based on these observations and limitations of a  
reconstruction of only a single model simulation, we assign an ( $\pm 1\sigma$ )  $\pm 4.4 \mu\text{mol kg}^{-1} C_{\text{anth}}$  uncertainty to TRACEv1  
estimates, that grows to  $\pm 15\%$  of any estimate when this percentage is larger than  $\pm 4.4 \mu\text{mol kg}^{-1}$ . This uncertainty  
115 estimate is combined with the Monte Carlo uncertainty estimate (Supplementary Text S7) using a formula provided  
in the main text.

**Table S1.** TRACEv1\_validation\_NorESM misfits for reconstructions of the NorESM  $C_{\text{anth}}$  distributions. Misfits are quantified directly from simulated transient tracer measurements interpolated from full 3-D gridded output (meas. direct  $\alpha$ ) to the locations and times of measurements in the real ocean, from these same values when the  $\alpha$  has been reconstructed at these same locations using a neural network (meas. with NN), and for the full 3D model domain again using the NN to remap  $\alpha$  (full grid with NN). These last reconstructions are also used to calculate an error in the reconstructed full ocean  $C_{\text{anth}}$  inventory in 1980 and 2014 given in PgC (and as a percentage of the total inventory in parentheses).

| Quantity                               | Bias or error | RMSE | Units                                            |
|----------------------------------------|---------------|------|--------------------------------------------------|
| meas., direct $\alpha$                 | -1.5          | 4.5  | $\mu\text{mol } C_{\text{anth}} \text{ kg}^{-1}$ |
| meas. with NN                          | -1.2          | 4.1  | $\mu\text{mol } C_{\text{anth}} \text{ kg}^{-1}$ |
| full grid, with NN ( $u_{\text{MR}}$ ) | -0.6          | 4.4  | $\mu\text{mol } C_{\text{anth}} \text{ kg}^{-1}$ |
| Inventory in 1980 (modeled: 110 PgC)   | -11 (-10%)    | -    | PgC (% of total)                                 |
| Inventory in 2014 (modeled: 197 PgC)   | -7 (-3%)      | -    | PgC (% of total)                                 |

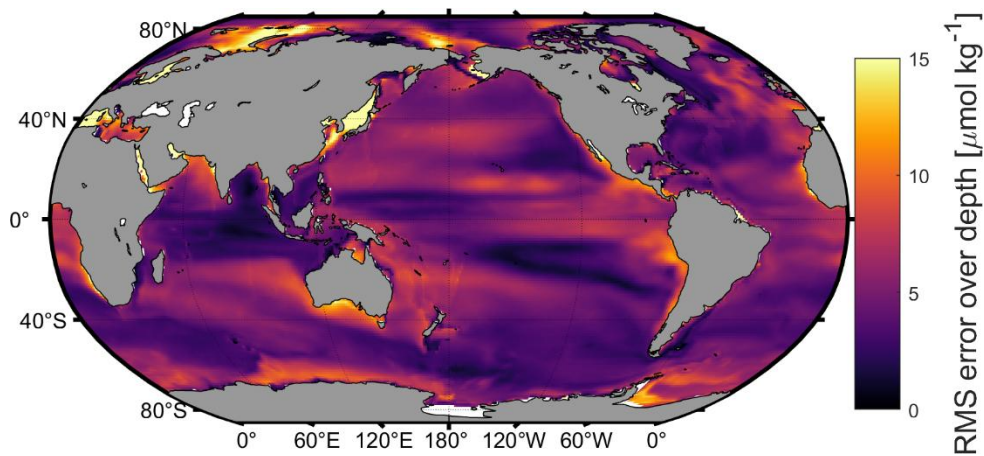

**Figure S1.** Root mean squared  $C_{\text{anth}}$  error mapped regionally (for all estimates across depth) in NorESM model year 2014.5 c.e.

120 We can examine the regional distribution of RMS (computed for all estimates vertically) residuals globally (Figure S1). The largest errors are found in the Arctic and in marginal seas including the Baltic, Mediterranean, and the East Sea/Sea of Japan. In most of these areas there are few training data, and similar neural networks have noted reconstruction errors in such locations previously (Carter et al., 2021a). This provides a caution against using TRACEv1 in enclosed basins that lack the full suite of transient tracer measurements. In addition, there is an indication that RMS reconstruction error increases near coastlines and especially in areas of strong upwelling. This feature is even more noticeable at the ocean surface where there seems to be a pronounced over-estimation of  $C_{\text{anth}}$  in upwelling regimes such as the California Current, the Eastern Tropical Pacific, the Peru Current, and the Benguela Current (Figure S2a). This implies that the neural network fit of  $\alpha$  is not well-capturing the shift in the  $C_{\text{anth}}$  content that accompanies changes in  $S$  and  $T$  when upwelled water with lower  $C_{\text{anth}}$  is brought to the surface. Larger reconstruction errors in dynamic coastal environments are a common problem for  $C_{\text{anth}}$  estimates where uncertainties of 50% have been reported (Feely et al., 2016). The TRACEv1 reconstruction uncertainty seems to be closer to ~30% in these areas (Figure 2b). TRACEv1 uncertainty estimates do not account for this regionally-enhanced uncertainty. It is likely that a broader transient tracer measurement training product and iteration on the fitting terms for the neural networks could allow better resolution of these dynamic features in future versions of TRACE.

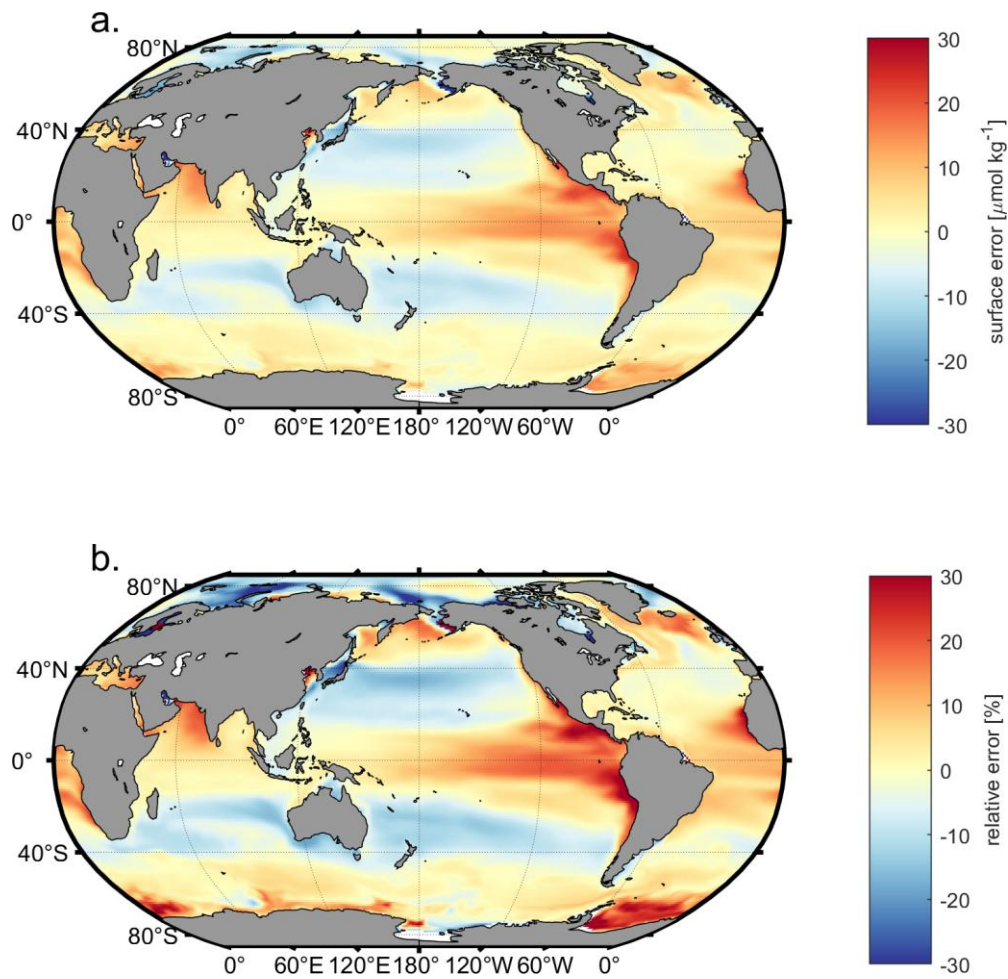

**Figure S2.** Map of the (a) surface  $C_{\text{anth}}$  estimate error and (b) its value expressed as a percentage of the estimate.

## 7 Supplementary Text S7: Monte Carlo Analysis

The Monte Carlo analysis uses 10 versions of TRACE, TRACEv1\_MonteCarlo\_1 through TRACEv1\_MonteCarlo\_10, which were trained using data with two sets of perturbations applied. For each cruise in GLODAPv2.2023, relative perturbations were selected from a normally distributed population with a mean of 0 and a standard deviation of 2% for CFCs and 3% for SF<sub>6</sub> and added to the measurements. However, when 2% of the CFC-11 or CFC-12 measurement is less than 0.005 pmol kg<sup>-1</sup>, or when 3% of the SF<sub>6</sub> measurement is less than 0.05 fmol kg<sup>-1</sup>, then we select random measurement perturbations from populations with standard deviations equal to the larger percentages implied by these two minimum-measurement error thresholds (up to 100% of the values for the smallest concentrations). This perturbation represents systematic cruise-wide measurement uncertainty sources. We similarly perturb each individual transient tracer measurement in the data product by a second unique perturbation selected for that measurement from the same population of offsets. This perturbation represents measurement-specific uncertainties.

The Monte Carlo analysis reveals that the applied measurement uncertainties generate an additional  $\pm 2 \mu\text{mol kg}^{-1}$  of RMS  $C_{\text{anth}}$  estimate variability and a small ( $-0.2 \mu\text{mol kg}^{-1}$ )  $C_{\text{anth}}$  bias. On a global scale, this analysis induces an RMS global inventory estimate variability of  $\pm 0.6\%$  from transient tracer measurement uncertainties and increases the overall inventory by 1.5%. Interestingly, the measurement uncertainties induce a larger  $+0.8 \mu\text{mol kg}^{-1}$   $C_{\text{anth}}$  bias if the OCIM  $A$  estimates are omitted from the fitting. Omitting this constraint results in an inventory bias of  $+3.4$  and  $+6.4$  PgC in 1980 and 2014, respectively. The positive biases induced by transient tracer measurement errors are likely a consequence of the non-linearities between transient tracer concentration histories, apparent age, and atmospheric  $C_{\text{anth}}$  accumulation.

## 8 Supplementary Text S8: Age estimate comparisons

TRACEv1 is used to reproduce the  $A$  data product of Jeannson et al. (2021) and it shows approximately comparable ages for the subset of the estimates that have more than  $30 \mu\text{mol kg}^{-1}$   $C_{\text{anth}}$  (Figure S3a). TRACEv1 ages are, if anything, on average younger than the TTD ages of Jeannson et al. (2021) obtained from SF<sub>6</sub> by an average of 2.5 years for this subset. The largest differences are found in the deep Atlantic and Pacific where—like the OCIM  $A$  values—the TRACEv1 ages are younger in the Atlantic and older in the Pacific. TRACEv1  $A$  estimates are generally comparable to the OCIM  $A$  estimates, though they are younger on average, particularly for the water masses where the  $C_{\text{anth}}$  is estimated to be between  $\sim 10$  and  $30 \mu\text{mol kg}^{-1}$  (Fig. S3c).

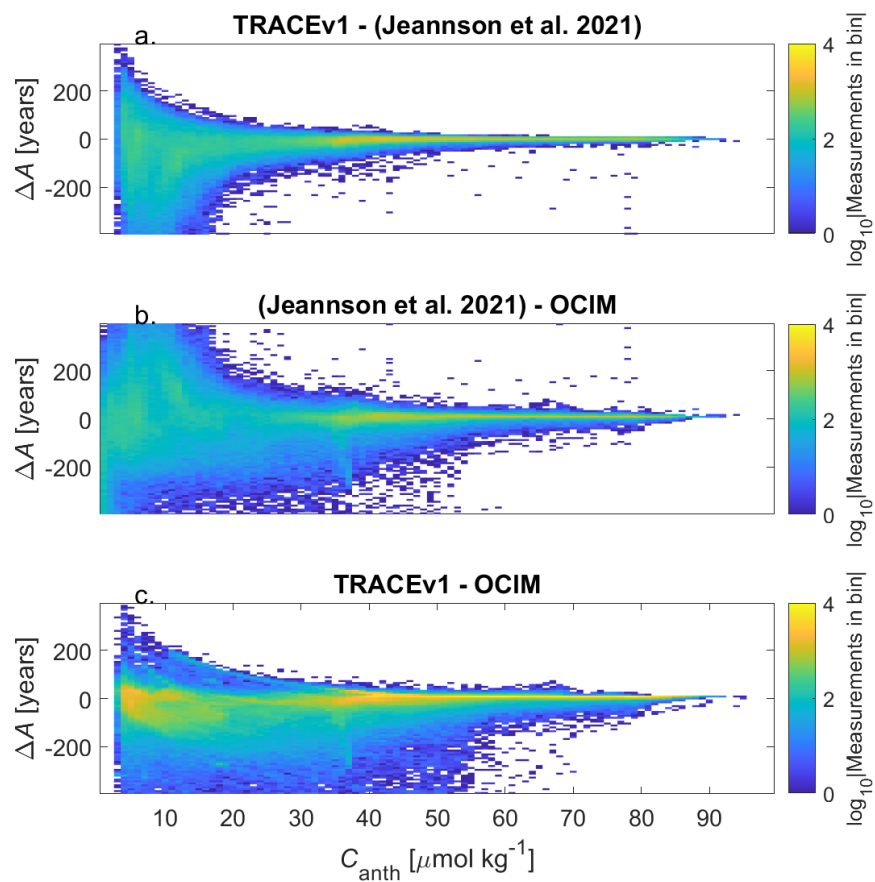

**Figure S3.** Two dimensional histograms in color comparing the distributions of age estimates from various approaches. There is comparatively strong coherence between estimates in the well-ventilated waters with significant  $C_{\text{anth}}$  (i.e., the warmest colors indicating bins with high data density are near  $\Delta A=0$ ). For waters with less  $C_{\text{anth}}$  the OCIM tends to have the oldest  $A$  estimates and TRACEv1 tends to have the youngest.

## 9 Supplementary Text S9: Comparison to the GLODAPv2 gridded product

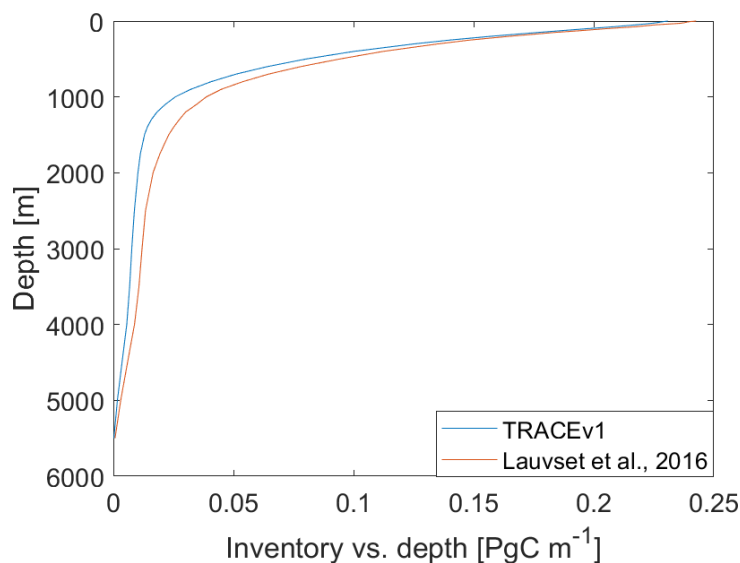

**Figure S4.** Inventory vs. depth in 2002 from the TRACEv1 and GLODAPv2 gridded (Lauvset et al., 2016) products.

170 The published  $C_{\text{anth}}$  distribution from the gridded GLODAPv2 data product (Lauvset et al., 2016) allows us to examine the source of the largest disagreement in greater detail. Most of the disagreement is found at depth, with the gridded GLODAPv2 product showing greater anthropogenic carbon inventories below 500 m (Figure S4). There are several differences between TRACEv1 and the TTD approach of Lauvset et al. (2016) that could account for the differences in the inferred inventories in 2002: the inclusion of the “CO<sub>2</sub> disequilibrium” adjustment in

175 TRACEv1 (which lowers  $C_{\text{anth}}$  estimates except following atmospheric  $x\text{CO}_2$  declines in some SSP projections), the use of OCIM  $A$  and the inclusion of SF<sub>6</sub> as additional TTD fitting constraints by TRACEv1, differences between the shape of the TTDs fit, and the use of transient steady state by Lauvset et al. (2016) to adjust  $C_{\text{anth}}$  values to their 2002 values before gridding them to the GLODAPv2 grid vs. the use of neural networks with TRACEv1 to generate

180 TTDs and  $C_{\text{anth}}$  values for the GLODAPv2 grid. Omission of the OCIM ages has modest impact on the calculated inventories (<+1 PgC in the model validation and +3.4 to +6.4 PgC from the Monte Carlo analysis), but the combination remains insufficient to account for the difference, so there must be another source of disagreement. Waugh et al. (2006) revised their TTD estimates, which are similar to the estimates from (Lauvset et al. 2016), lower by 20% after observing a consistent overestimate from their TTD approach when it was applied in a model

185 environment with known  $C_{\text{anth}}$ . The disagreement was particularly strong in the Southern Ocean, and we note that this is one location where it can be unclear whether small transient tracer contents correspond to a large amount of old water mixed with a small amount of recent ventilation or a comparatively large fraction of water that was ventilated in the era when atmospheric transient tracer concentrations were first becoming measurable. As the rise in atmospheric CO<sub>2</sub> began well before the rise in transient tracer concentrations (Fig. 4a), these two interpretations result in different calculated  $C_{\text{anth}}$  values. The use of SF<sub>6</sub>, with a distinct atmospheric growth history from CFC-11

190 and CFC-12, as an additional constraint by TRACEv1 presumably helps with this disambiguation somewhat. It does not appear that TRACEv1  $A$  estimates are significantly older than the ages obtained from other transient tracer



TTD based estimates, as might be implied by TRACEv1  $C_{\text{anth}}$  inventory being smaller than the inventory from Lauvset et al. (2016) (Supplementary Text S8). As there are multiple possible explanations, the primary source of the disagreement is unclear.

195

## 10 Supplementary References

- 200 Bittig, H. C., Steinhoff, T., Claustre, H., Fiedler, B., Williams, N. L., Sauzède, R., Körtzinger, A., and Gattuso, J.-P.: An Alternative to Static Climatologies: Robust Estimation of Open Ocean CO<sub>2</sub> Variables and Nutrient Concentrations From T, S, and O<sub>2</sub> Data Using Bayesian Neural Networks, *Frontiers in Marine Science*, 5, 328, <https://doi.org/10.3389/fmars.2018.00328>, 2018.
- Carter, B. R., Bittig, H. C., Fassbender, A. J., Sharp, J. D., Takeshita, Y., Xu, Y. Y., Álvarez, M., Wanninkhof, R., Feely, R. A., and Barbero, L.: New and updated global empirical seawater property estimation routines, *Limnology and Oceanography: Methods*, <https://doi.org/10.1002/LOM3.10461>, 2021a.
- 205 Carter, B. R., Feely, R. A., Lauvset, S. K., Olsen, A., DeVries, T., and Sonnerup, R.: Preformed Properties for Marine Organic Matter and Carbonate Mineral Cycling Quantification, *Global Biogeochemical Cycles*, 35, e2020GB006623, <https://doi.org/10.1029/2020GB006623>, 2021b.
- Feely, R. A., Alin, S. R., Carter, B. R., Bednar??ek, N., Hales, B., Chan, F., Hill, T. M., Gaylord, B., Sanford, E., Byrne, R. H., Sabine, C. L., Greeley, D., and Juranek, L.: Chemical and biological impacts of ocean acidification along the west coast of North America, *Estuarine, Coastal and Shelf Science*, 183, <https://doi.org/10.1016/j.ecss.2016.08.043>, 2016.
- 210 He, Y.-C., Tjiputra, J., Langehaug, H. R., Jeansson, E., Gao, Y., Schwinger, J., and Olsen, A.: A Model-Based Evaluation of the Inverse Gaussian Transit-Time Distribution Method for Inferring Anthropogenic Carbon Storage in the Ocean, *Journal of Geophysical Research: Oceans*, 123, 1777–1800, <https://doi.org/10.1002/2017JC013504>, 2018.
- 215 Lauvset, S. K., Key, R. M., Olsen, A., Heuven, S. van, Velo, A., Lin, X., Schirmick, C., Kozyr, A., Tanhua, T., Hoppema, M., Jutterström, S., Steinfeldt, R., Jeansson, E., Ishii, M., Perez, F. F., Suzuki, T., and Watelet, S.: A new global interior ocean mapped climatology: the 1° × 1° GLODAP version 2, *Earth System Science Data*, 8, 325–340, <https://doi.org/10.5194/ESSD-8-325-2016>, 2016.
- Müller, J. D.: RECCAP2-ocean data collection, <https://doi.org/10.5281/zenodo.7990823>, 2023.
- 220 Waugh, D. W., Hall, T. M., Meneil, B. I., Key, R., and Matear, R. J.: Anthropogenic CO<sub>2</sub> in the oceans estimated using transit time distributions, *Tellus B: Chemical and Physical Meteorology*, 58, 376–389, <https://doi.org/10.1111/j.1600-0889.2006.00222.x>, 2006.
